1 **Serotonin and dopamine modulate aging in response to food perception and availability**

2  
3  
4

5 **Authors:**

6 Hillary A. Miller<sup>1\*</sup>, Shijiao Huang<sup>2\*</sup>, Megan L. Schaller<sup>2</sup>, Elizabeth S. Dean<sup>2</sup>, Angela M. Tuckowski<sup>1</sup>,  
7 Allyson S. Munneke<sup>1</sup>, Safa Beydoun<sup>2</sup>, Scott D. Pletcher<sup>2</sup>, and Scott F. Leiser<sup>2,3#</sup>

8  
9

**Affiliations:**

- 10 1. Cellular and Molecular Biology Program, University of Michigan, Ann Arbor, MI 48109, USA.  
11 2. Molecular & Integrative Physiology Department, University of Michigan, Ann Arbor, MI 48109  
12 3. Department of Internal Medicine, University of Michigan, Ann Arbor, MI 48109, USA.

13

14 \* Both authors contributed equally to this work.

15 # Corresponding author, Scott F. Leiser, leiser@umich.edu

16

17 **Keywords:**

18 *C. elegans*; *D. melanogaster*; mammalian cells; lifespan; aging; mianserin; thioridazine; serotonin;  
19 dopamine; cell-nonautonomous; flavin containing monooxygenase; fmo-2; dietary restriction; nervous  
20 system

## 21 **Abstract**

22 An organism's ability to perceive and respond to changes in its environment is crucial for its  
23 health and survival. Here we reveal how the most well-studied longevity intervention, dietary  
24 restriction (DR), acts in-part through a cell non-autonomous signaling pathway that is inhibited  
25 by the perception of attractive smells. Using an intestinal reporter for a key gene induced by DR  
26 but suppressed by attractive smells, we identify three compounds that block food perception in  
27 *C. elegans*, thereby increasing longevity as DR mimetics. These compounds clearly implicate  
28 serotonin and dopamine in limiting lifespan in response to food perception. We further identify  
29 an enteric neuron in this pathway that signals through the serotonin receptor 5-HT1A/ser-4 and  
30 dopamine receptor DRD2/dop-3. Aspects of this pathway are conserved in *D. melanogaster* and  
31 mammalian cells. Thus, blocking food perception through antagonism of serotonin or dopamine  
32 receptors is a plausible approach to mimic the benefits of dietary restriction.

33

## 34 **Main**

35 Rapid advances in aging research have identified several conserved signaling pathways that  
36 influence aging in organisms across taxa<sup>1</sup>. Recent work shows that many of these “longevity  
37 pathways” act through cell non-autonomous signaling mechanisms<sup>2,3</sup>. These pathways utilize  
38 sensory cells—frequently neurons—to signal to peripheral tissues and promote survival during  
39 the presence of external stress. Importantly, this neuronal activation of stress response pathways,  
40 through either genetic modification or exposure to environmental stress, is often sufficient to  
41 improve health and longevity. Despite mounting evidence that neuronal signaling can influence  
42 multiple longevity pathways, less is known about which specific cells and molecules propagate  
43 these signals.

44 Biogenic amines are among the most well-studied and conserved neuronal signaling  
45 molecules<sup>4,5</sup>. Specifically, serotonin and dopamine play well-defined roles in behavior and  
46 physiology. However, their role in aging is less well understood. Several recent studies implicate  
47 serotonin, but not dopamine, as an important signal in multiple *C. elegans* longevity pathways  
48 including the response to heat shock and hypoxia<sup>6,7</sup>. Dopaminergic signaling is associated with  
49 physical activity in humans and loss of this signaling decreases lifespan in mice<sup>8</sup> and blocks  
50 lifespan extension in nematodes<sup>9</sup>. Serotonin and dopamine levels both decrease with age across  
51 species<sup>10,11</sup>, consistent with these signaling pathways promoting healthy aging. Despite rigorous  
52 study and clinical use of drugs that modify serotonin and dopamine signaling, our understanding  
53 of their complex actions and potential interaction is far from complete.

54 Dietary restriction (DR) is the most well-studied and consistent intervention known to  
55 improve health and longevity in organisms ranging from single-celled yeast to primates<sup>12</sup>. DR  
56 leads to improved cell survival and stress resistance, complex intracellular signaling events,  
57 metabolic changes, and increased activity in multiple organisms. Nematode flavin-containing  
58 monooxygenase-2 (*fmo-2*) is necessary and sufficient to increase health and longevity  
59 downstream of DR. FMOs are highly conserved proteins that are also induced in multiple  
60 mammalian models with increased lifespan<sup>13,14</sup>. Having previously identified a role for *fmo-2* in  
61 aging, we wondered whether DR cell non-autonomously regulates *fmo-2* induction and whether  
62 perception of food through biogenic amines could be involved in the subsequent signaling  
63 pathway.

64

## 65 **Results**

### 66 **Attractant food perception represses *fmo-2* to limit longevity.**

67 We developed an integrated single-copy *mCherry* reporter driven by the *fmo-2* promoter to  
68 measure *fmo-2* induction. The reporter is primarily expressed in the intestine and responds to  
69 stimuli previously reported to induce *fmo-2*, including DR. As an intestinal protein<sup>15</sup>, we  
70 expected that *fmo-2* would likely be induced cell autonomously by the change in nutrient intake  
71 under DR. To test this hypothesis, we asked whether the perception of food smell by worms in  
72 the absence of eating can abrogate the induction of *fmo-2*. Using a “sandwich plate” assay as  
73 described in **Figure 1A**, we were surprised to find a significant reduction in *fmo-2* induction  
74 when worms could smell but not eat food (**Figure 1B-C**). This reduction is consistent with a  
75 model in which increased *fmo-2* mediates the increase in longevity from DR, as food smell  
76 completely abrogates this lifespan extension (**Figure 1D**, lifespan statistics in Table S1)<sup>16</sup>. We  
77 also find that active bacterial metabolism is required to abrogate *fmo-2* induction, as the “smell”  
78 of bacteria metabolically killed with 0.5% paraformaldehyde does not prevent DR from inducing  
79 *fmo-2* expression (Figure S1A-B). Since intestinal cells are not known to perceive external  
80 environmental cues such as smell, these results suggest that *fmo-2* expression is suppressed when  
81 food is present through cell non-autonomous signaling.

82

83 We next wondered what types of odorant compounds worms sense in this pathway. Bacteria are  
84 known to secrete hundreds of volatile compounds that are classified in three categories based on  
85 how they promote chemotaxis: attractants, repellants, and neutral compounds<sup>17-19</sup>. We tested  
86 whether exposure to any volatile compound secreted from bacteria is sufficient to block the  
87 lifespan-promoting effects of DR or whether compounds identified as attractants and repellants

88 oppositely regulate *fmo-2* induction. Using compounds derived from studies of the *E. coli* strain  
89 HB101 in a range of concentrations (Table S2), we find that attractants are more likely to  
90 suppress DR-mediated induction of *fmo-2* (**Figure 1E-F**) whereas neutral and repellent  
91 compounds can induce *fmo-2* under fed conditions (Figure S1C-H). We also find that many  
92 compounds suppress *fmo-2* expression, consistent with the hypothesis that this pathway is not  
93 acting through a single receptor (**Figure 1G**, all results in Figure S2A-Z). These results support a  
94 model in which perception of attractive smells secreted by *E. coli* abrogates the induction of the  
95 pro-longevity gene *fmo-2*. This is consistent with these smells preventing the lifespan-promoting  
96 effects of DR, possibly through a neural response to external stimuli that leads to physiological  
97 changes in peripheral tissues.

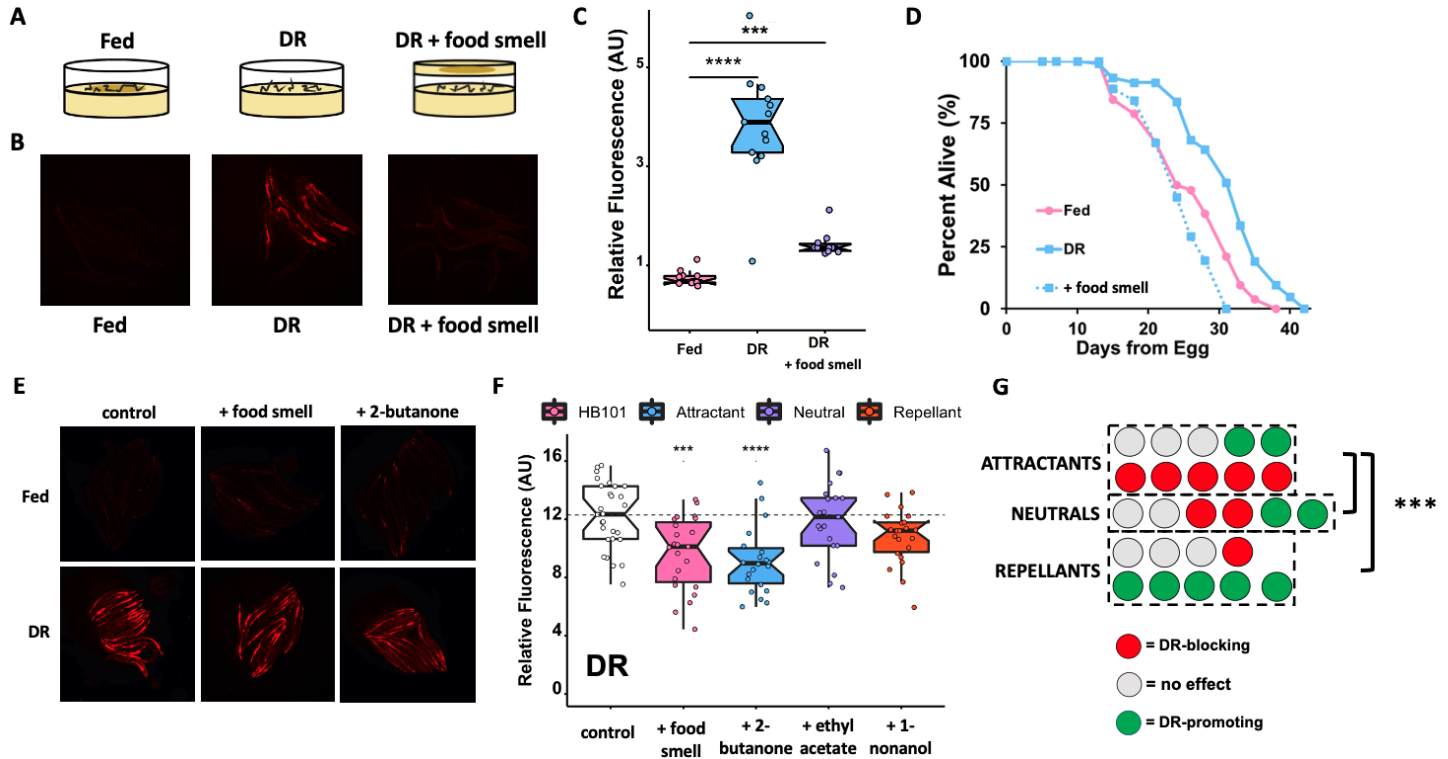

8  
9 **Figure 1. Attractive food smell blocks dietary restriction-mediated *fmo-2* induction and longevity.** Diagram of  
10 “smell plates” (A). Images (B) and quantification (C) of individual *fmo-2p::mCherry* worms on fed (pink), DR (blue) and  
11 DR + food smell (OP50) (purple). Survival curves (D) of N2 (WT) animals fed (pink) or DR (blue) under normal  
12 conditions (solid lines) or subjected to the smell of bacteria (dotted lines). Images (E) and quantification (F) of individual  
13 *fmo-2p::mCherry* worms on DR plates exposed to food smell (HB101) (pink) or attractive (2-butanone in blue), neutral  
14 (ethyl acetate in purple), or repellent (1-nonanol in orange) odorants. (G) Summary of the effects of 26 odorants on *fmo-2*  
15 induction during DR. \*\*\* denotes  $P < .001$ , \*\*\*\* denotes  $P < .0001$  when compared to fed (Tukey’s HSD) ### denotes  $P <$   
16  $0.001$  when compared to neutrals (ANOVA).

107 **Serotonin and dopamine antagonists induce *fmo-2* to mimic DR longevity.**

108 Biogenic amines can regulate pro-longevity pathways and are involved in behavioral changes in  
109 response to food<sup>6, 7, 20-22</sup>. We next asked whether neurotransmitters are involved in the *fmo-2*-  
110 mediated food perception pathway. Using a targeted approach focusing on neurotransmitters and  
111 their antagonists, we tested for compounds sufficient to prevent the abrogation of *fmo-2*  
112 induction in the presence of food smell (Figure S3A-D). The biogenic amine neurotransmitter  
113 antagonists mianserin (for serotonin) and thioridazine and trifluoperazine (for dopamine)  
114 consistently and significantly restore *fmo-2* induction to DR levels in the presence of food smell  
115 (**Figure 2A-C**, Figure S3E-F). Mianserin is a tetracycline serotonin antagonist that is thought to  
116 competitively bind to specific serotonergic G protein-coupled receptors (GPCRs)<sup>23</sup> while  
117 thioridazine and trifluoperazine's mechanism of action involves blocking dopamine receptors<sup>24</sup>.  
118 Importantly, while each compound induces *fmo-2* to a different extent (**Figure 2D**, Figure  
119 S3G and S3I), when combined with DR, no antagonist further induced *fmo-2*, suggesting they act  
120 in the same pathway (**Figure 2E**, Figure S3H-I). Diphenyleneiodonium chloride (DPI), an  
121 inhibitor of NADPH oxidase, acts as a positive control, and further induces *fmo-2* when  
122 combined with DR (**Figure 2E**). Because thioridazine and trifluoperazine act through similar  
123 mechanisms and the effects of thioridazine were more consistent in our studies, we focused  
124 further experiments on dopamine antagonism through thioridazine. Together, these results  
125 support antagonism of serotonin or dopamine as partial mimetics of DR in their induction of  
126 *fmo-2*.

127  
128 To validate that the induction of *fmo-2* through biogenic amine antagonism is beneficial for  
129 longevity, we next asked whether these compounds extend lifespan. We find that both mianserin

130 and thioridazine extend lifespan on agar plates in a dose-dependent manner (**Figure 2F-G**)<sup>25</sup>.  
131 Since we identified mianserin and thioridazine through their induction of *fmo-2*, and previously  
132 found that *fmo-2* is necessary for DR-mediated lifespan extension, we next asked whether *fmo-2*  
133 was necessary for the beneficial longevity effects of mianserin or thioridazine. Our results show  
134 that the *fmo-2* loss of function completely blocks the lifespan effect of mianserin (**Figure 2H**)  
135 and thioridazine (**Figure 2I**). Importantly, we also see that mianserin treatment combined with  
136 DR does not further extend lifespan (Figure S3J). These results are consistent with these  
137 compounds mimicking some aspects of DR-signaling, recapitulating part of the DR lifespan  
138 extension effect. Collectively, this supports a model where DR induces *fmo-2* because of  
139 decreased biogenic amine signaling and establishes neuromodulators as a useful tool to decipher  
140 where in the signaling pathway a cell, signal, or receptor plays a role in DR-mediated longevity.



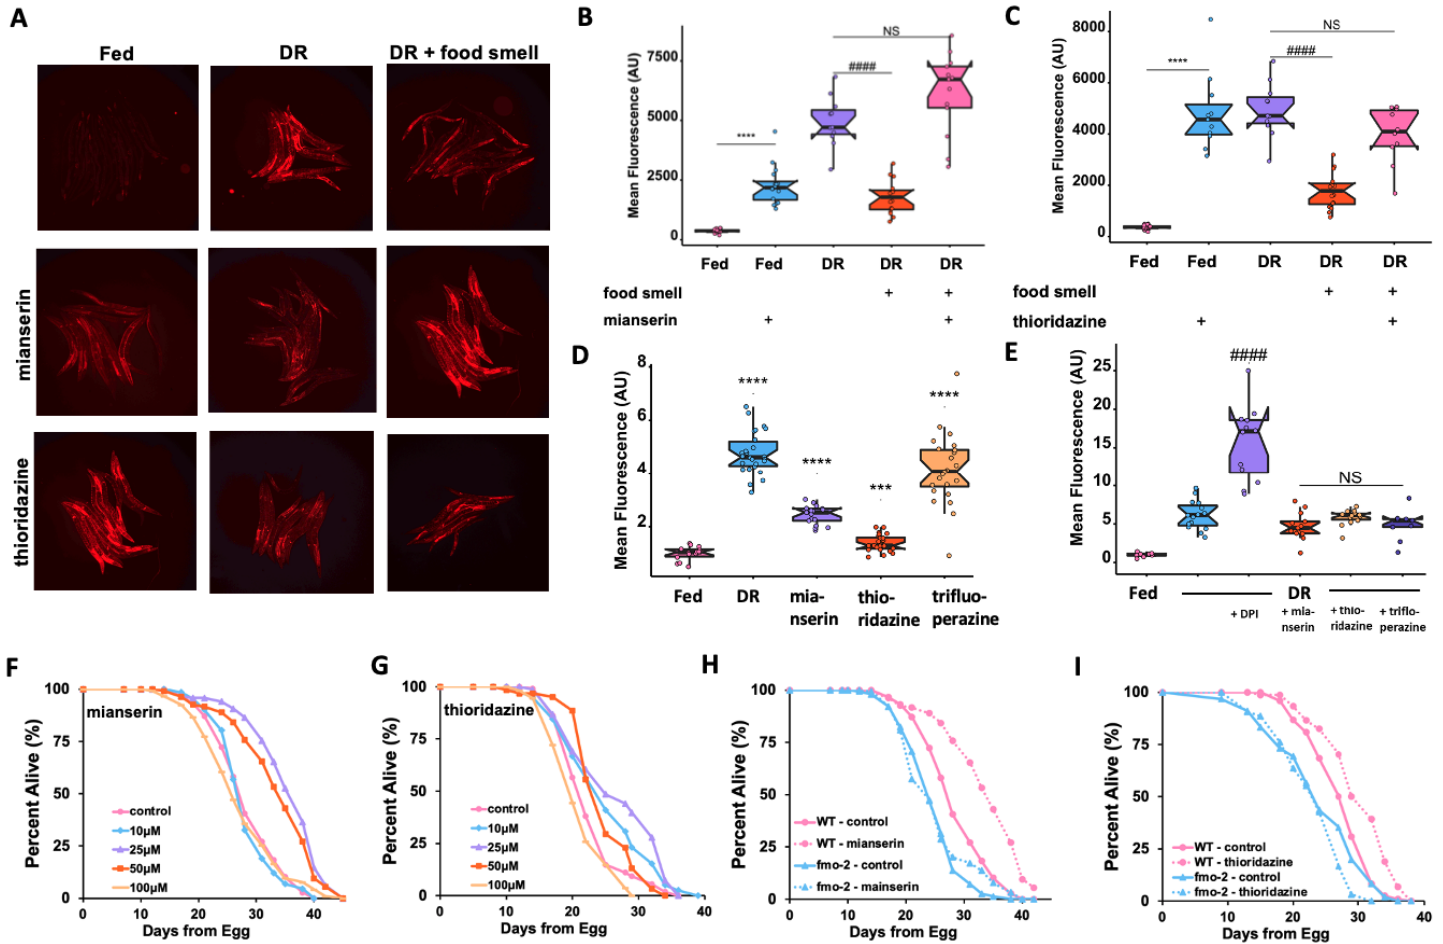

**Figure 2. Serotonin and dopamine antagonists induce *fmo-2* and extend lifespan.** Images (A) and quantification of *fmo-2p::mCherry* exposed 100 $\mu$ M of mianserin (B) or thioridazine (C) (blue) in combination with DR (orange) and food smell (pink) compared to DR alone (purple). Quantification (D) of *fmo-2p::mCherry* exposed to water (pink), DR (blue), 100 $\mu$ M mianserin (purple), thioridazine (orange), or trifluoperazine (yellow). Quantification (E) of *fmo-2p::mCherry* exposed to water (pink) or DR (blue) in combination with 500 $\mu$ M DPI (purple), 100 $\mu$ M mianserin (orange), 100 $\mu$ M thioridazine (yellow), or 100 $\mu$ M trifluoperazine (dark purple). Survival curves (F) of N2 (WT) animals treated with 0 $\mu$ M (water; pink), 10 $\mu$ M (blue), 25 $\mu$ M (purple), 50 $\mu$ M (orange), or 100 $\mu$ M (yellow) mianserin. Survival curves (G) of WT animals treated with 0 $\mu$ M (water; pink), 10 $\mu$ M (blue), 25 $\mu$ M (purple), 50 $\mu$ M (orange), or 100 $\mu$ M (yellow) thioridazine. Survival curves (H) of WT animals (pink) and *fmo-2* KO animals (blue) on water (solid lines) or 50 $\mu$ M mianserin (dotted lines). Survival curves (I) of WT animals (pink) and *fmo-2* KO animals (blue) on water (solid lines) or 25 $\mu$ M thioridazine (dotted lines). \*\*\* denotes  $P < .001$ , \*\*\*\* denotes  $P < .0001$  when compared to fed (Tukey's HSD). ##### denotes  $P < .0001$  when compared to DR (Tukey's HSD).

154 **DR signaling acts through a pair of enteric neurons.**

155 Our initial results establish that antagonizing serotonin and dopamine signaling leads to  
156 induction of the longevity promoting *fmo-2* gene and rescue of the negative effects of food smell.  
157 Based on this, we hypothesized that the relative lack of food smell during DR leads to increased  
158 longevity through induction of intestinal *fmo-2*. Using this framework, we next sought to better  
159 understand how the sensing of bacteria (or lack thereof) is communicated to intestinal cells  
160 during DR. Our results, knocking down the synaptic vesicle exocytosis gene *unc-13*, support  
161 short-range neurotransmitters as necessary for *fmo-2* induction (Figure S4A-B).

162  
163 In *C. elegans*, perception of the external environment is largely regulated by a specialized organ  
164 known as the amphid. Since a previous report using a solid-liquid DR approach suggested a  
165 pathway originating in the ASI amphid neurons, we first asked whether these cells are required  
166 to modulate *fmo-2* activity during DR<sup>26</sup>. We find that not only are the ASI neurons (as measured  
167 by *daf-3* and *daf-7* RNAi) dispensable for food perception-mediated reduction in *fmo-2*  
168 expression (Figure S4C-D), but proper formation of the amphid (*daf-6*) is also not required  
169 (Figure S4E-F). This result is consistent with a non-canonical sensory neuron playing a role in  
170 food perception-mediated *fmo-2* suppression.

171  
172 To better map this pathway, we next asked whether the biogenic amine serotonin is involved in  
173 the DR-mediated longevity pathway, and if so, where. We tested whether knocking out serotonin  
174 signaling would mimic the effects of DR. We subjected animals lacking *tph-1*, the rate-limiting  
175 enzyme necessary to produce serotonin, to DR and mianserin. *tph-1* animals are long-lived  
176 compared to wild-type<sup>27</sup> and not further extended by our DR protocol (**Figure 3A**) or mianserin

177 treatment (Figure S5A). These data are supported by the abatement of *fmo-2* induction on DR  
178 (**Figure 3B-C**) and mianserin (Figure S5B-C) when animals are subjected to *tph-1(RNAi)*. As  
179 post-mitotic animals, *C. elegans* have a finite number of neurons with discrete connectivity and  
180 functions. Three neuronal pairs normally express *tph-1*<sup>28</sup>. The hermaphrodite specific motor  
181 neurons (HSN) are located along the ventral tail and regulate egg-laying<sup>29</sup> whereas two head  
182 neuron pairs, the amphid neurons with dual sensory endings (ADF) and the neurosecretory motor  
183 (NSM) neurons, are involved in modifying behavioral states<sup>20, 30, 31</sup>. To investigate the potential  
184 role of these neuron pairs, we utilized *tph-1* cell-specific knockout and rescue strains and found  
185 that *tph-1* expression in NSM, but not the ADF, neurons (Figure S5D-E) is necessary (Figure  
186 S5F) and sufficient (**Figure 3D**) to promote DR-mediated longevity. These results implicate the  
187 NSM neurons as two of the primary neurons involved in reversing the effects of DR under food  
188 smell.

189  
190 Recent research posits that NSM neurons function similar to enteric neurons with neural  
191 projections that directly communicate with the pharynx through a pair of acid-sensing ion  
192 channels (ASICs), DEL-3 and DEL-7. Signaling through these channels informs the worm to  
193 slow locomotion upon contact with food<sup>30</sup>. These data led us to wonder whether the longevity  
194 effects of DR also require the ASICs channels to extend lifespan. We find that *del-7* mutants  
195 look phenotypically wild type in their induction of *fmo-2* and lifespan extension, in either DR or  
196 DR + food smell (Figure S6A-C). Interestingly, *del-3* mutant worms show abrogated induction  
197 of *fmo-2* under DR, and did not diminish *fmo-2* induction in response to the smell of food  
198 (**Figure 3E-F**). These *del-3* mutant animals still exhibit lifespan extension under DR, despite the  
199 decreased induction of *fmo-2*, which is not abrogated by the smell of food (**Figure 3G**).

200 Together, these data support a model whereby the enteric NSM neurons release serotonin in  
201 response to food perception and the lack of this release extends longevity. In addition, the ASIC  
202 DEL-3 plays a role in the NSM to both behaviorally<sup>30</sup> and physiologically respond to food  
203 perception signals.

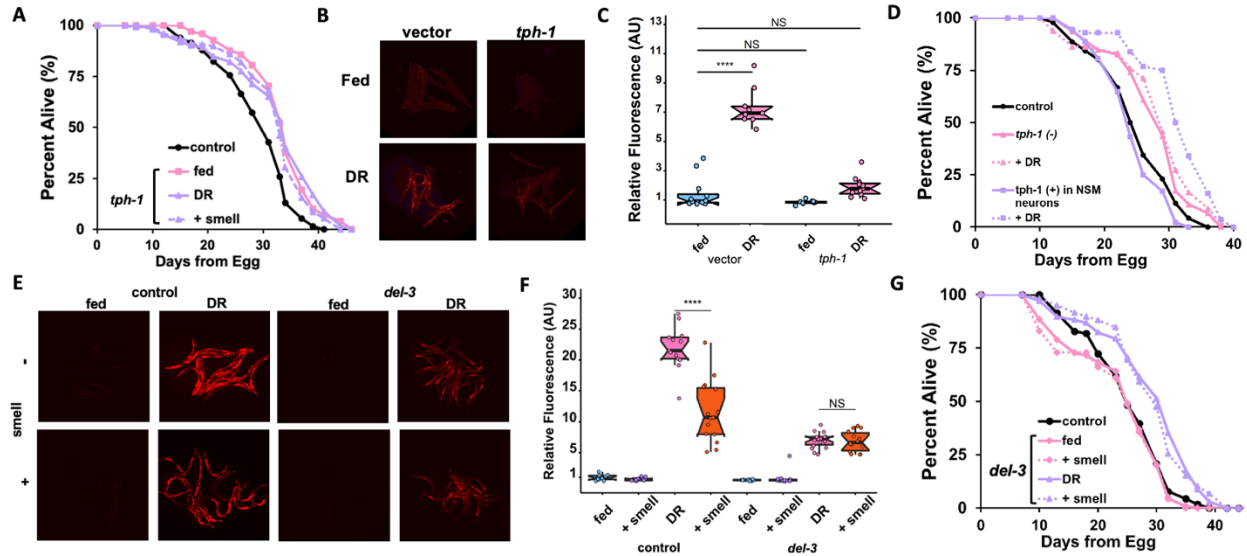

204

205 **Figure 3. Food signals emanate from the NSM neurons.** Survival curves (A) of WT animals (black)

206 and *tph-1* KO animals on fed (pink) and DR (purple) conditions exposed to food smell (dotted lines).

207 Images (B) and quantification (C) of *fmo-2p::mCherry* exposed to *tph-1* RNAi on fed (blue) or DR (pink).

208 Survival curves (D) comparing control (black), *tph-1* KO (pink), and *tph-1* NSM-specific rescue (purple)

209 animals on fed (solid line) and DR (dotted lines). Images (E) and quantification (F) of *fmo-2p::mCherry*

210 in a WT (control) and *del-3* background on fed (blue) and DR (pink) exposed to food smell (purple and

211 orange, respectively). Survival curves of conditions comparing WT (black) to *del-3* (G) on fed (pink) and

212 DR (purple) conditions in combination with food smell (dotted lines). \*\*\*\* denotes  $P < .0001$  when

213 compared to vector RNAi fed (Tukey's HSD).

214 **Mianserin mimics DR by antagonizing the 5-HT1A receptor SER-4.**

215 Prior reports suggest that serotonin receptor orthologs *ser-1* and *ser-4* are necessary for the  
216 lifespan benefits of mianserin in *C. elegans*<sup>32</sup>, and we hypothesized that a subset of the serotonin  
217 receptor orthologs will also be necessary for mianserin and DR-mediated *fmo-2* induction. After  
218 two generations of RNAi treatment, *ser-1* and *ser-4* were the only two receptors that proved  
219 necessary for *fmo-2* induction on mianserin (**Figure 4A**, Figure S7A-C) whereas *ser-4*  
220 knockdown most robustly abrogated DR-mediated *fmo-2* induction (Figure S7D-E). Further, we  
221 see that *ser-4(RNAi)* slightly but significantly increases lifespan and prevents DR from extending  
222 lifespan (**Figure 4B**), supporting the hypothesis that mianserin acts as a DR mimetic by  
223 antagonizing serotonin signaling that occurs during feeding. Finally, to investigate whether this  
224 effect is mediated by neuronal signaling or intestinal SER-4 expression, we rescued *ser-4*  
225 knockout animals with tissue-specific promoters and found that only neuronal *unc-119p::ser-4* is  
226 sufficient to rescue full induction of *fmo-2* under DR (**Figure 4C-D**). This is consistent with  
227 serotonergic signaling within the nervous system, and not directly to the intestine, regulating the  
228 response to food and food smell.

229

230 **Thioridazine induces *fmo-2* and extends lifespan through Dopamine receptor DOP-**

231 **3/DRD2.**

232 Thioridazine is a compound that antagonizes dopamine receptor D2 (DRD2) in mammals<sup>33</sup>, and  
233 induces *fmo-2* and mimics DR to increase longevity in nematodes (**Figure 2**). Based on its role  
234 in mammals, we tested whether nematode DRD2 is involved in DR and mianserin-related *fmo-2*  
235 induction and longevity. When the DRD2 ortholog *dop-3* is knocked down by RNAi, *fmo-2*  
236 induction is not affected in fed conditions but its induction by DR is diminished, while its

237 induction by thioridazine is completely abrogated (**Figure 4E**, Figure S8A). This result is  
238 consistent with *dop-3* being required for dopaminergic induction of *fmo-2*. To demonstrate the  
239 epistasis of DOP-3 and SER-4 in the signaling pathway, we combined *ser-4* RNAi with  
240 mianserin and thioridazine treatment. The results show that *ser-4* depletion blocks *fmo-2*  
241 induction by thioridazine as well as suppresses *fmo-2* induction by mianserin, as expected  
242 (**Figure 4A**). Similarly, depletion of *dop-3* blocks both mianserin and thioridazine from inducing  
243 *fmo-2* (**Figure 4E**). These results support a model where both serotonin and dopamine signaling  
244 are epistatic to each other and are each required for full induction of *fmo-2* under DR.  
245 Interestingly, when *ser-4* or *dop-3* receptors are completely absent, via null mutation, the mutant  
246 animals show dysregulation of *fmo-2* induction, suggesting that the lack of biogenic amine  
247 signaling increases variability in responding to environmental changes (Figure S7F-G, S8B-D).  
248 To test whether DOP-3/DRD2 is necessary for lifespan extension by DR and mianserin, we  
249 depleted *dop-3* with RNAi under DR and found that *dop-3* depletion increases lifespan but is not  
250 further extended by DR (**Figure 4F**). Together, these results suggest that dopamine and serotonin  
251 signaling interactively induce *fmo-2* and extend lifespan under DR.

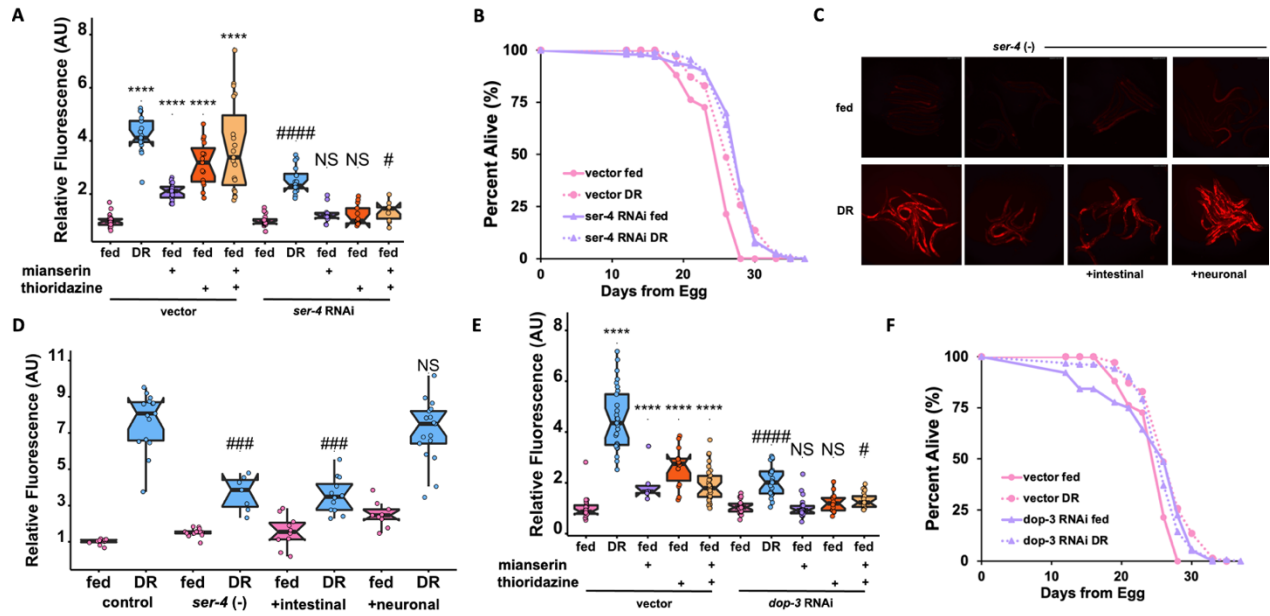

252

253 **Figure 4. 5-HT1A receptor *ser-4* and DRD2 receptor *dop-3* act downstream of food perception.**

254 Quantification (A) of individual *fmo-2p::mCherry* worms on fed (pink), and DR (blue) treated with  
 255 100μM mianserin (purple), 100 μM thioridazine (orange), or combined (orange) worms fed vector or *ser-*  
 256 *4* RNAi. Survival curves (B) of WT animals on vector RNAi in pink and *ser-4* RNAi in purple on fed  
 257 (solid lines) or DR (dotted lines) conditions. Images (C) and quantification (D) of *fmo-2p::mCherry* or  
 258 *ser-4* with tissue-specific rescues added back on fed (pink) and DR (blue). Quantification (E) of  
 259 individual *fmo-2p::mCherry* worms on fed (pink), and DR (blue) treated with 100μM mianserin (purple),  
 260 100 μM thioridazine (orange), or combined (orange) worms fed vector or *dop-3* RNAi. Survival curves  
 261 (F) of WT animals on vector RNAi in pink and *dop-3* RNAi in purple on fed (solid lines) or DR (dotted  
 262 lines) conditions. \*\*\*\* denotes P<.0001 when compared to vector RNAi fed (Tukey's HSD). # denotes  
 263 P<.05, ##### denotes P<.0001 when compared to *ser-4/dop-3* RNAi fed (Tukey's HSD).



264 **Mianserin induces FMOs and promotes stress resistance in mammalian cells.**

265 Having identified serotonin and dopamine antagonism upstream of *fmo-2* induction under DR,  
266 we were curious whether these relationships might be conserved. In mammals, previous studies  
267 show interventions that increase longevity often both induced Fmo genes and increased stress  
268 resistance<sup>13, 34</sup>. Thus we tested whether mianserin and thioridazine are sufficient to induce  
269 mammalian Fmo genes and whether this induction could confer stress resistance, as a surrogate  
270 for longevity<sup>35</sup>. Our results, using human liver (HepG2) cells, show that while thioridazine did  
271 not lead to any changes (Figure S9A), perhaps due to lack of DRD2 receptor expression,  
272 mianserin treatment at 2 $\mu$ M increased protein levels of mammalian FMO2 (**Figure 5A-B**) and  
273 FMO1 (Figure S9B-C), while 0.1 $\mu$ M mianserin increased protein levels of FMO4 (Figure S9B  
274 and S9D). FMO3 and FMO5 protein levels are not changed upon mianserin treatment (Figure  
275 S9B and S9E-F). Since stress resistance is often correlated with increased lifespan both within  
276 and between species, and *fmo-2* increases stress resistance in *C. elegans*, we next examined  
277 whether mianserin also promotes stress resistance<sup>35</sup>. We treated cells with paraquat, an inducer  
278 of mitochondrial oxidative stress through increased production of the reactive oxygen species  
279 (ROS) superoxide, and find that 2  $\mu$ M mianserin, the dose that showed maximal induction of  
280 FMOs, slightly but significantly improves the survival of HepG2 cells under an increasing dose  
281 of paraquat (Figure S9G). These data support serotonin antagonism as a conserved mechanism to  
282 induce Fmo expression and improve stress resistance.

283

284 **Mianserin extends *D. melanogaster* lifespan similar to *C. elegans*.**

285 Since mianserin induces mammalian Fmos and promotes survival under paraquat stress, we  
286 tested whether it also affects lifespan in evolutionarily distant species. Similar to data in worms,  
287 recent data in the vinegar fly *D. melanogaster* show that altered serotonin signaling can change  
288 their ability to assess caloric quality and modulate lifespan<sup>21</sup>. As we found a narrow range of  
289 effective doses in worms (**Figure 2F**), we tested a slightly higher dose of mianserin in vinegar  
290 flies (2 mM) for its effect on Fmo2 induction. The resulting data show that both mianserin and  
291 fasting (DR) increase expression of fly *fmo-2* expression (**Figure 5C**), but not *fmo-1* (Figure  
292 S10A). We then asked whether mianserin could also extend lifespan in flies. Using several  
293 concentrations, we find a positive correlation between mianserin dosage and increased lifespan  
294 until reaching a detrimental level of serotonin antagonism (**Figure 5D**, Figure S10B-D). We also  
295 find a comparable dose response among male and female flies. We note that mianserin treatment  
296 does not significantly alter food consumption (Figure S10E-F), as measured by the Fly Liquid-  
297 Food Interaction Counter (FLIC) assay<sup>36</sup>. Together, these results are consistent with conserved  
298 induction of *fmos* by mianserin and DR, in addition to conserved lifespan extension.

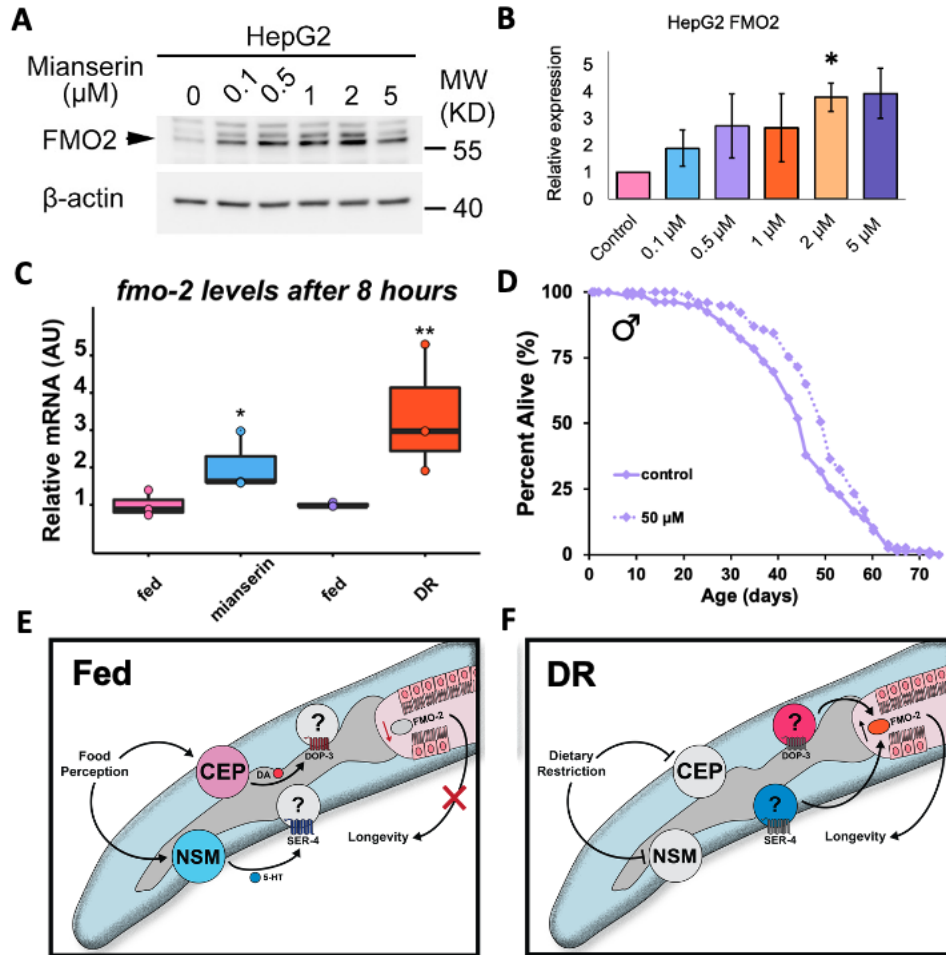

299

300

**Figure 5. Serotonin antagonist mianserin induces FMO and improves health in Drosophila and**

301

**mammalian cells.** Western blot image (A) and quantification (B) of FMO1 in whole cell lysates from

302

HepG2 cells treated with 0.1  $\mu$ M, 0.5  $\mu$ M, 1  $\mu$ M, 2  $\mu$ M, or 5  $\mu$ M mianserin. *Fmo-2* mRNA levels (C)

303

after eight hours of 2mM mianserin (blue) or starvation (orange) compared to water controls (pink and

304

purple, respectively). Survival curves of male flies treated with water (solid line) or 50 $\mu$ M (dotted line)

305

mianserin (D). Panels E and F depict the “on/off” state worm’s toggle between when perceiving food.

306

\* denotes  $P < .05$ , \*\* denotes  $P < .01$  when compared to control or fed (student’s t-test).

## 307 **Discussion**

308 Our experimental data in *C. elegans* support a model where the lack of an attractive (food) smell  
309 leads to a loss of serotonin release from the enteric NSM neurons and lack of serotonin binding  
310 to the SER-4/5-HT1A receptor. This in turn or in combination with other cues leads to a  
311 reduction in dopamine signaling to downstream DOP-3/DRD2 receptors. It is notable that both  
312 SER-4 and DOP-3 receptors are known to dampen adenylyl cyclase activity when bound, thus  
313 the lack of signal will increase the probability of excitement of the cell expressing these  
314 receptors. We hypothesize worms toggle their serotonin and dopamine neural activity “on” or  
315 “off” depending on the presence or absence of food, respectively (**Figure 5E-F**). Based on our  
316 ability to rescue DR benefits when food is perceived, we hypothesize that the perception of food  
317 during DR prevents the benefits of DR, rather than shortening lifespan through an independent  
318 pathway (Figure S10G). Critically, these data highlight that understanding how the nervous  
319 system evaluates and appropriately integrates large amounts of external stimuli, like the  
320 availability of food, allows us to target the decision-making processes to mimic pro-longevity  
321 pathways.

322

323 It is intriguing that dopamine and serotonin signaling interactively induce *fmo-2* and extend  
324 lifespan in a common pathway induced by dietary restriction. In nematodes, slowing locomotion  
325 in the presence of food is thought to be distinctly regulated by pharyngeal mechanosensation  
326 leading to dopamine release while dwelling behavior is potentiated by serotonin<sup>37</sup>. Significant  
327 scientific effort has identified much of the specific circuitry these neurotransmitters use to  
328 promote changes in chemotaxis and egg-laying<sup>20, 30, 38-40</sup>. The results suggest worms can interpret  
329 and implement a diverse set of responses to their changing environment. In mammals, SER-4/5-

330 HT1A receptor activation increases dopamine release throughout the brain<sup>41, 42</sup>. Similarly, recent  
331 work shows release of serotonin and dopamine in the human brain influence non-reward-based  
332 aspects of cognition and behavior like decision making<sup>43</sup>. These findings support a conserved  
333 link between these two neurotransmitters in regulating complex phenotypes like aging.

334

335 It is also intriguing that one of these drugs, mianserin, successfully induces Fmo genes in both  
336 mammals and flies, and leads to increased stress resistance and lifespan, respectively. Since  
337 mianserin treatment extends fly lifespan we suspect it acts through a similar mechanism,  
338 serotonin antagonism, to mimic DR. This hypothesis is bolstered by *fmo-2* induction under acute  
339 mianserin exposure and fasting, analogous to what we see in *C. elegans*. It is not known whether  
340 FMOs or 5-HT1A receptors are necessary for mianserin or DR-mediated longevity in flies, but  
341 5-HT2A receptors are necessary for proper food valuation<sup>21</sup> suggesting that altering serotonin  
342 signaling may prove fruitful in future studies. In cells, the induction of Fmos by mianserin must  
343 be direct, suggesting that either serotonergic signaling is more direct in mammalian systems, or  
344 more likely, there are other nuances in this signaling in mammals we do not yet understand.  
345 Mammals and *C. elegans* share a single common ancestral Fmo<sup>15</sup> and mammalian Fmos share  
346 similar homology to *C. elegans fmo-2*, with Fmo5 having the highest % identity. It is notable that  
347 5-HT1A expression is detected in hepatocytes (The Human Protein Atlas), supporting a similar  
348 mechanism in these cells and suggesting that FMOs can be induced by serotonin antagonism  
349 both directly and indirectly. It will be interesting to investigate whether mianserin is beneficial  
350 for health and longevity in mammals. To achieve this goal, it is imperative that we understand  
351 the causative changes of pro-longevity drugs, such as atypical serotonin antagonists that are  
352 known to have pleiotropic effects in humans. In addition to providing the potential for long-term

353 health benefits, this knowledge will benefit our understanding of serotonin and dopamine  
354 signaling networks that affect numerous human processes and diseases outside of aging.

355

### 356 **Authorship Contributions**

357 H.A.M., S.H., and S.F.L developed the conceptual framework and wrote the manuscript.

358 H.A.M., S.H., M.L.S., E.S.D., A.M.T., A.S.M., S.B., and S.F.L. contributed to data collection

359 and analysis. H.A.M. and E.S.D. prepared the figures and tables. All authors reviewed and

360 approved the manuscript.

361

### 362 **References**

363 1. López-Otín C, Blasco MA, Partridge L, Serrano M, Kroemer G. The hallmarks of aging.

364 *Cell*. Jun 2013;153(6):1194-217. doi:10.1016/j.cell.2013.05.039

365 2. Medkour Y, Svistkova V, Titorenko VI. Cell-Nonautonomous Mechanisms Underlying  
366 Cellular and Organismal Aging. *Int Rev Cell Mol Biol*. 2016;321:259-97.

367 doi:10.1016/bs.ircmb.2015.09.003

368 3. Miller HA, Dean ES, Pletcher SD, Leiser SF. Cell non-autonomous regulation of health  
369 and longevity. *Elife*. Dec 2020;9doi:10.7554/eLife.62659

370 4. Berger M, Gray JA, Roth BL. The expanded biology of serotonin. *Annu Rev Med*.

371 2009;60:355-66. doi:10.1146/annurev.med.60.042307.110802

372 5. Arias-Carrión O, Stamelou M, Murillo-Rodríguez E, Menéndez-González M, Pöppel E.  
373 Dopaminergic reward system: a short integrative review. *Int Arch Med*. Oct 2010;3:24.

374 doi:10.1186/1755-7682-3-24

375 6. Tatum MC, Ooi FK, Chikka MR, et al. Neuronal serotonin release triggers the heat shock  
376 response in *C. elegans* in the absence of temperature increase. *Curr Biol*. Jan 2015;25(2):163-74.

377 doi:10.1016/j.cub.2014.11.040

378 7. Leiser SF, Miller H, Rossner R, et al. Cell nonautonomous activation of flavin-containing  
379 monooxygenase promotes longevity and health span. *Science*. Nov

380 2015;doi:10.1126/science.aac9257

381 8. Grady DL, Thanos PK, Corrada MM, et al. DRD4 genotype predicts longevity in mouse  
382 and human. *J Neurosci*. Jan 2013;33(1):286-91. doi:10.1523/JNEUROSCI.3515-12.2013

383 9. Saharia K, Kumar R, Gupta K, Mishra S, Subramaniam JR. Reserpine requires the D2-  
384 type receptor. *J Biosci*. Dec 2016;41(4):689-695. doi:10.1007/s12038-016-9652-7

385 10. Yin JA, Liu XJ, Yuan J, Jiang J, Cai SQ. Longevity manipulations differentially affect  
386 serotonin/dopamine level and behavioral deterioration in aging *Caenorhabditis elegans*. *J*

387 *Neurosci*. Mar 2014;34(11):3947-58. doi:10.1523/JNEUROSCI.4013-13.2014

388 11. Peters R. Ageing and the brain. *Postgrad Med J*. Feb 2006;82(964):84-8.

389 doi:10.1136/pgmj.2005.036665

- 390 12. Fontana L, Partridge L, Longo VD. Extending Healthy Life Span--From Yeast to  
391 Humans. *Science*. April 16, 2010 2010;328(5976):321-326. doi:10.1126/science.1172539
- 392 13. Steinbaugh MJ, Sun LY, Bartke A, Miller RA. Activation of genes involved in  
393 xenobiotic metabolism is a shared signature of mouse models with extended lifespan. *Am J*  
394 *Physiol Endocrinol Metab*. Aug 2012;303(4):E488-95. doi:10.1152/ajpendo.00110.2012
- 395 14. Swindell WR. Genes and gene expression modules associated with caloric restriction and  
396 aging in the laboratory mouse. *BMC Genomics*. 2009;10:585. doi:10.1186/1471-2164-10-585
- 397 15. Petalcorin MI, Joshua GW, Agapow PM, Dolphin CT. The fmo genes of *Caenorhabditis*  
398 *elegans* and *C. briggsae*: characterisation, gene expression and comparative genomic analysis.  
399 *Gene*. Feb 2005;346:83-96. doi:10.1016/j.gene.2004.09.021
- 400 16. Kaeberlein TL, Smith ED, Tsuchiya M, et al. Lifespan extension in *Caenorhabditis*  
401 *elegans* by complete removal of food. *Aging Cell*. Dec 2006;5(6):487-94.
- 402 17. Bargmann CI, Hartweg E, Horvitz HR. Odorant-selective genes and neurons mediate  
403 olfaction in *C. elegans*. *Cell*. Aug 1993;74(3):515-27. doi:10.1016/0092-8674(93)80053-h
- 404 18. Worthy SE, Haynes L, Chambers M, et al. Identification of attractive odorants released  
405 by preferred bacterial food found in the natural habitats of *C. elegans*. *PLoS One*.  
406 2018;13(7):e0201158. doi:10.1371/journal.pone.0201158
- 407 19. Nuttley WM, Atkinson-Leadbeater KP, Van Der Kooy D. Serotonin mediates food-odor  
408 associative learning in the nematode *Caenorhabditiselegans*. *Proc Natl Acad Sci U S A*. Sep  
409 2002;99(19):12449-54. doi:10.1073/pnas.192101699
- 410 20. Flavell SW, Pokala N, Macosko EZ, Albrecht DR, Larsch J, Bargmann CI. Serotonin and  
411 the neuropeptide PDF initiate and extend opposing behavioral states in *C. elegans*. *Cell*. Aug  
412 2013;154(5):1023-35. doi:10.1016/j.cell.2013.08.001
- 413 21. Ro J, Pak G, Malec PA, et al. Serotonin signaling mediates protein valuation and aging.  
414 *Elife*. Aug 2016;5doi:10.7554/eLife.16843
- 415 22. Linford NJ, Ro J, Chung BY, Pletcher SD. Gustatory and metabolic perception of  
416 nutrient stress in *Drosophila*. *Proc Natl Acad Sci U S A*. Feb 2015;112(8):2587-92.  
417 doi:10.1073/pnas.1401501112
- 418 23. Marshall RJ. The pharmacology of mianserin--an update. *Br J Clin Pharmacol*. 1983;15  
419 Suppl 2:263S-268S. doi:10.1111/j.1365-2125.1983.tb05874.x
- 420 24. Shana M, Feinberg KF, Abdolreza Saadabadi. StatPearls. *Thioridazine*. Stat Pearls;  
421 2020.
- 422 25. Petrascheck M, Ye X, Buck LB. An antidepressant that extends lifespan in adult  
423 *Caenorhabditis elegans*. *Nature*. Nov 2007;450(7169):553-6. doi:10.1038/nature05991
- 424 26. Bishop NA, Guarente L. Two neurons mediate diet-restriction-induced longevity in *C.*  
425 *elegans*. *Nature*. May 2007;447(7144):545-9. doi:10.1038/nature05904
- 426 27. Murakami H, Murakami S. Serotonin receptors antagonistically modulate *Caenorhabditis*  
427 *elegans* longevity. *Aging Cell*. Aug 2007;6(4):483-8. doi:10.1111/j.1474-9726.2007.00303.x
- 428 28. Sze JY, Victor M, Loer C, Shi Y, Ruvkun G. Food and metabolic signalling defects in a  
429 *Caenorhabditis elegans* serotonin-synthesis mutant. *Nature*. Feb 2000;403(6769):560-4.  
430 doi:10.1038/35000609
- 431 29. Trent C, Tsung N, Horvitz HR. Egg-laying defective mutants of the nematode  
432 *Caenorhabditis Elegans*. *Genetics*. August 1, 1983 1983;104(4):619-647.
- 433 30. Rhoades JL, Nelson JC, Nwabudike I, et al. ASICs Mediate Food Responses in an  
434 Enteric Serotonergic Neuron that Controls Foraging Behaviors. *Cell*. 01 2019;176(1-2):85-  
435 97.e14. doi:10.1016/j.cell.2018.11.023

- 436 31. Churgin MA, McCloskey RJ, Peters E, Fang-Yen C. Antagonistic Serotonergic and  
437 Octopaminergic Neural Circuits Mediate Food-Dependent Locomotory Behavior in  
438 *Caenorhabditis elegans*. *J Neurosci*. Aug 2017;37(33):7811-7823.  
439 doi:10.1523/JNEUROSCI.2636-16.2017
- 440 32. Petrascheck M, Ye X, Buck LB. A high-throughput screen for chemicals that increase the  
441 lifespan of *Caenorhabditis elegans*. *Ann N Y Acad Sci*. Jul 2009;1170:698-701.  
442 doi:10.1111/j.1749-6632.2009.04377.x
- 443 33. StatPearls. 2020.
- 444 34. Murakami S, Salmon A, Miller RA. Multiplex stress resistance in cells from long-lived  
445 dwarf mice. *FASEB J*. Aug 2003;17(11):1565-6. doi:10.1096/fj.02-1092fje
- 446 35. Harper JM, Salmon AB, Leiser SF, Galecki AT, Miller RA. Skin-derived fibroblasts  
447 from long-lived species are resistant to some, but not all, lethal stresses and to the mitochondrial  
448 inhibitor rotenone. *Aging Cell*. Feb 2007;6(1):1-13. doi:ACE255 [pii]  
449 10.1111/j.1474-9726.2006.00255.x
- 450 36. Ro J, Harvanek ZM, Pletcher SD. FLIC: high-throughput, continuous analysis of feeding  
451 behaviors in *Drosophila*. *PLoS One*. 2014;9(6):e101107. doi:10.1371/journal.pone.0101107
- 452 37. Sawin ER, Ranganathan R, Horvitz HR. *C. elegans* locomotory rate is modulated by the  
453 environment through a dopaminergic pathway and by experience through a serotonergic  
454 pathway. *Neuron*. Jun 2000;26(3):619-31. doi:10.1016/s0896-6273(00)81199-x
- 455 38. Cermak N, Yu SK, Clark R, Huang YC, Baskoylu SN, Flavell SW. Whole-organism  
456 behavioral profiling reveals a role for dopamine in state-dependent motor program coupling in.  
457 *Elife*. Jun 2020;9doi:10.7554/eLife.57093
- 458 39. Hills T, Brockie PJ, Maricq AV. Dopamine and glutamate control area-restricted search  
459 behavior in *Caenorhabditis elegans*. *J Neurosci*. Feb 2004;24(5):1217-25.  
460 doi:10.1523/JNEUROSCI.1569-03.2004
- 461 40. Lee KS, Iwanir S, Kopito RB, et al. Serotonin-dependent kinetics of feeding bursts  
462 underlie a graded response to food availability in *C. elegans*. *Nat Commun*. 02 2017;8:14221.  
463 doi:10.1038/ncomms14221
- 464 41. Li Z, Ichikawa J, Dai J, Meltzer HY. Aripiprazole, a novel antipsychotic drug,  
465 preferentially increases dopamine release in the prefrontal cortex and hippocampus in rat brain.  
466 *Eur J Pharmacol*. Jun 2004;493(1-3):75-83. doi:10.1016/j.ejphar.2004.04.028
- 467 42. Bantick RA, De Vries MH, Grasby PM. The effect of a 5-HT1A receptor agonist on  
468 striatal dopamine release. *Synapse*. Aug 2005;57(2):67-75. doi:10.1002/syn.20156
- 469 43. Bang D, Kishida KT, Lohrenz T, et al. Sub-second Dopamine and Serotonin Signaling in  
470 Human Striatum during Perceptual Decision-Making. *Neuron*. Oct  
471 2020;doi:10.1016/j.neuron.2020.09.015  
472
